# Supplementary material for: CdS/CdTe Heterostructures for Applications in Ultra-Thin Solar Cells
Source: PubMed Central journal article supplement (PMC6213385; doi:10.3390/ma11101788), 2018-09-20
Supplement: materials-11-01788-s001.pdf [file materials-11-01788-s001.pdf]

## Supplementary material

Growth rate determined for each material. Figure S1a u-SnO<sub>2</sub> and CdS and Figure S1b CdTe. All the experiments were carried out in Ar atmosphere; the substrate temperature and RF-power were fixed at 250 °C and 80 W, respectively.

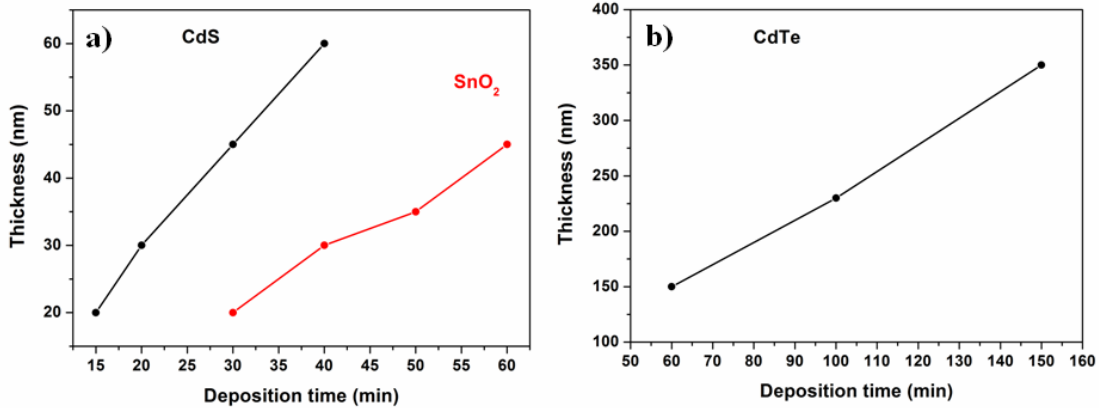

**Figure S1.** Growth rate determined for each material. (a) u-SnO<sub>2</sub> and CdS and (b) CdTe.

The transmission spectra were not appreciably modified by the insertion of the buffer layer. This was expected given the transparency of the u-SnO<sub>2</sub> layer. Figure S2 shows the transmission spectra for the CdTe layer and the heterostructures with and without buffer layer studied in this paper.

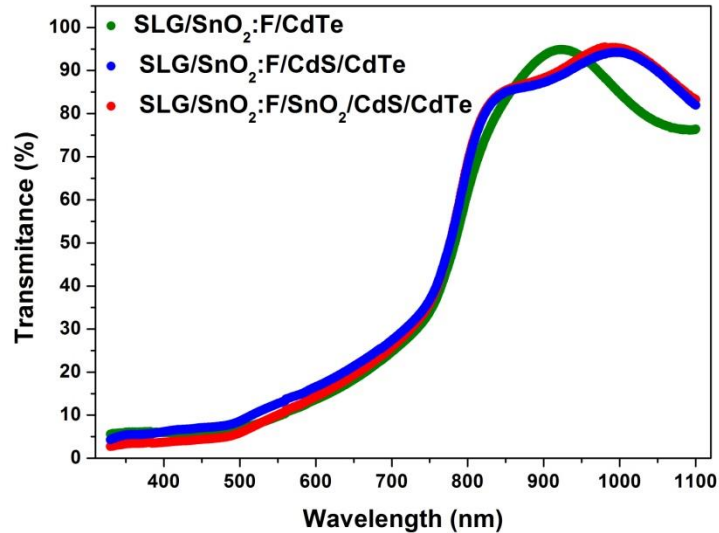

**Figure S2.** Transmission spectra for the CdTe layer and the heterostructures with and without buffer layer studied in this paper.

Figure S3 shows the statistics on the in-plane grain sizes in each layer. A total of 200 grains were measured and a histogram was created from the data. The data were adjusted with a Gaussian shape.

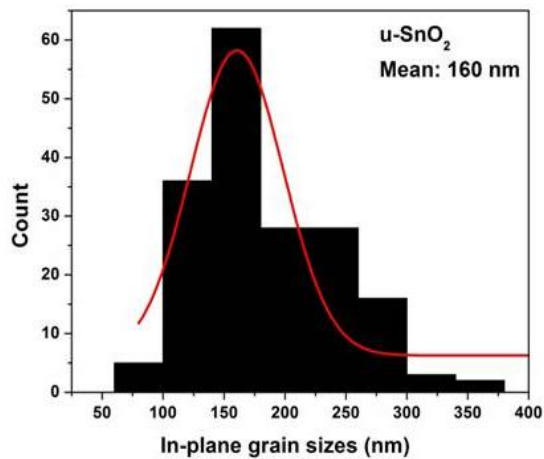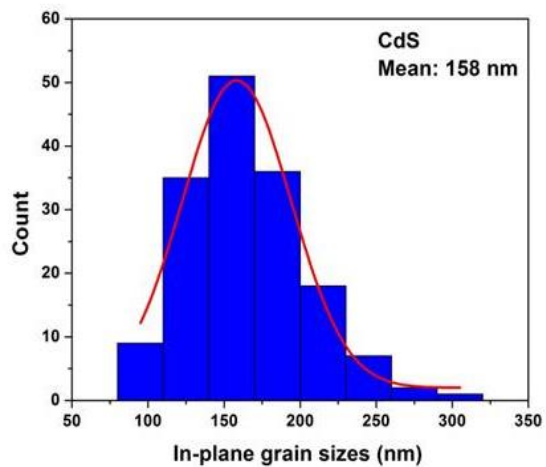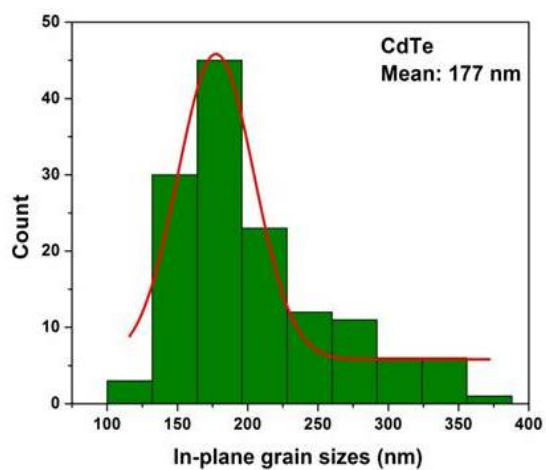

Figure S3. Histograms of the grain size values in each layer.
